1 **Atlantean Evolution in Darwin's Finches—Issues and Perspectives in Species Delimitation using**  
2 **Phenotypic Data**

3 **CARLOS DANIEL CADENA<sup>1\*</sup>, IVÁN JIMÉNEZ<sup>2</sup>, AND FELIPE ZAPATA<sup>3</sup>**

4 <sup>1</sup>*Departamento de Ciencias Biológicas, Universidad de los Andes, Bogotá, Colombia;* <sup>2</sup>*Center for Conservation and*  
5 *Sustainable Development, Missouri Botanical Garden, St. Louis, MO, USA;* <sup>3</sup>*Department of Ecology and*  
6 *Evolutionary Biology, University of California, Los Angeles, CA, USA.*

7 *\*Correspondence to be sent to: Departamento de Ciencias Biológicas, Universidad de los Andes, Carrera 1 no. 18A-*  
8 *10, Bogotá, Colombia; E-mail: ccadena@uniandes.edu.co*

9  
10 *Abstract.*— Progress in the development and use of methods for species delimitation employing  
11 phenotypic data lags behind conceptual and practical advances in molecular genetic approaches. The basic  
12 evolutionary model underlying the use of phenotypic data to delimit species assumes random mating and  
13 quantitative polygenic traits, so that phenotypic distributions within a species should be approximately  
14 normal for individuals of the same sex and age. Accordingly, two or more distinct normal distributions of  
15 phenotypic traits suggest the existence of multiple species. In light of this model, we show that analytical  
16 approaches employed in taxonomic studies using phenotypic data are often compromised by three issues:  
17 (1) reliance on graphical analyses of phenotypic space that do not consider the frequency of phenotypes;  
18 (2) exclusion of characters potentially important for species delimitation following reduction of data  
19 dimensionality; and (3) use of measures of central tendencies to evaluate phenotypic distinctiveness. We  
20 outline approaches to overcome these issues based on statistical developments related to normal mixture  
21 models and illustrate them empirically with a reanalysis of morphological data recently used to claim that  
22 there are no morphologically distinct species of Darwin's ground-finches (*Geospiza*). We found negligible  
23 support for this claim relative to taxonomic hypotheses recognizing multiple species. Although species  
24 limits among ground-finches merit further assessments using additional sources of information, our results  
25 bear implications for other areas of inquiry including speciation research: because ground-finches have  
26 likely speciated and are not trapped in a process of “Sisyphean” evolution as recently argued, they remain

27 useful models to understand the evolutionary forces involved in speciation. Our work underscores the  
28 importance of statistical approaches grounded on appropriate evolutionary models for species  
29 delimitation. Approaches allowing one to fit normal mixture models without *a priori* information about  
30 species limits offer new perspectives in the kind of inferences available to systematists, with significant  
31 repercussions on ideas about the structure of biological biodiversity. [morphology; normal mixture model;  
32 phenotype; principal components analysis; species limits; variable selection.]

33 Systematic biology seeks to discover and describe species, and to establish phylogenetic relationships  
34 among them and among clades at higher levels. Given these two main goals of the field, reviews published  
35 over a decade ago noted that the literature on theory and methods of phylogenetic inference and on theory  
36 of species concepts was extensive, whereas methods for delimiting species had received much less  
37 attention (Sites and Marshall 2003; Sites and Marshall 2004). Over the past few years, this imbalance has  
38 been partly overcome with considerable development, application, and integration of methods for species  
39 delimitation (Padial et al. 2010; Camargo and Sites 2013). Largely driven by increased availability of  
40 multilocus datasets brought about by advances in DNA sequencing technology, however, much recent  
41 progress has focused on probabilistic methods for analyses of molecular data (reviewed by Fujita et al.  
42 2012; Carstens et al. 2013), whereas relatively little effort has been devoted to approaches using  
43 phenotypic data to delimit species (Wiens and Servedio 2000; Ezard et al. 2010; Guillot et al. 2012;  
44 Zapata and Jiménez 2012; Edwards and Knowles 2014; Solís-Lemus et al. 2014). Yet, because most fossil  
45 and living species have been discovered and named based on phenotypic distinctiveness (Luckow 1995;  
46 Mallet 2013; Miller 2016), and because genomic-based species delimitation approaches are no substitutes  
47 for judicious assessments of other sources of information (Sukumaran and Knowles 2017), the theory and  
48 practice of delimiting species using phenotypic data remain central to modern systematics.

49  
50 Although species descriptions employing phenotypic data are often non-quantitative and although  
51 systematists may often not be explicit about the rationale they follow to delimit species (Luckow 1995;  
52 McDade 1995; Sangster 2014; Allmon 2016), the use of objective criteria for species diagnosis based on  
53 phenotypic characters has a long tradition in taxonomy, rooted on evolutionary theory (Wiens and  
54 Servedio 2000; Zapata and Jiménez 2012; Futuyma 2013). The basic evolutionary model for the  
55 distribution of a continuous quantitative character within a species (Fisher 1918) assumes polygenic  
56 inheritance and random mating; under these assumptions, gene frequencies are expected to be close to  
57 Hardy-Weinberg equilibrium and phenotypic variation among individuals of a single species tends to be  
58 normally distributed (Templeton 2006). On the other hand, if phenotypic variation is best described by

59 two or more distinct normal distributions, then one may conclude that there is more than one species in a  
60 sample of individuals (Coyne and Orr 2004; Mallet 2008). This conclusion is granted under the  
61 assumption that distinct normal distributions in polygenic traits do not reflect age- or sex-related variation,  
62 or phenotypic plasticity. It follows that distinct normal distributions in cases in which phenotypic variation  
63 is caused by few loci of large effect (e.g., Smith 1993) or largely driven by environmental factors (e.g.,  
64 Moczek and Emlen 1999) do not constitute evidence of more than one species. Finally, because distinct  
65 phenotypic distributions may represent evidence of species boundaries given a variety of criteria for  
66 species delimitation (Luckow 1995; Zapata and Jiménez 2012), the Fisherian model described above  
67 serves as a conceptual basis to establish species limits under multiple species definitions (sensu de  
68 Queiroz 1998).

69  
70 Despite the long tradition of this basic model for species delimitation based on quantitative phenotypic  
71 characters, statistical tools for its formal application to empirical data were limited until recently.  
72 Procedures allowing one to fit combinations of normal distributions to phenotypic variation among  
73 specimens, without *a priori* knowledge of species limits, were initially developed in the late XIX century  
74 (Pearson 1894). However, practical application only became possible following computational advances  
75 in the 1970s (i.e., the expectation–maximization algorithm; McLachlan and Peel 2000) and software  
76 development from the late XX century into the present (Fraley and Raftery 2002; Fraley et al. 2012).  
77 Because these statistical approaches entered the literature on species delimitation only a few years ago  
78 (Ezard et al. 2010), it is not surprising that even recent studies do not employ them when analyzing  
79 phenotypic data to delimit species. Instead, systematists frequently infer species limits examining  
80 phenotypic variation based on visual inspection of scatter plots defined by a few axes that account for  
81 most phenotypic variance, often derived from principal components analysis (PCA). In addition,  
82 systematists often delimit species based on differences between groups of specimens in the central  
83 tendency of phenotypes. This is true of work on living plants and animals (reviewed by Rieseberg et al.  
84 2006), as well as in studies of extinct taxa in the fossil record (reviewed by Allmon 2016).

85  
86 Here, we show that analytical approaches commonly employed in taxonomic studies are inadequate in  
87 light of the evolutionary model underlying species delimitation described above. It follows that if species  
88 delimited by inadequate statistical approaches are used as units for subsequent analyses, then any mistakes  
89 may carry on and influence views in other areas of inquiry, such as speciation research. Focusing on  
90 Darwin's finches from the Galapagos Islands, an iconic group for the study of natural selection,  
91 speciation, and adaptive radiation (Lack 1947; Bowman 1961; Grant 1999; Grant and Grant 2008; Grant  
92 and Grant 2014), we provide an example of how employing statistical approaches explicitly related to the  
93 basic evolutionary model underlying the use of phenotypic data in species delimitation may enhance  
94 assessments of species limits and thus our understanding of evolutionary processes.

95

#### 96 SISYPHEAN EVOLUTION IN DARWIN'S FINCHES?

97 Among Darwin's finches, the many studies of ground-finches in the genus *Geospiza* have been especially  
98 productive in terms of insights into species formation and the role of geographic isolation, natural  
99 selection, and hybridization in microevolutionary processes that may scale up to macroevolutionary  
100 patterns (reviewed by Grant 1999; Grant and Grant 2008; Grant and Grant 2014). There has been  
101 considerable disagreement in the literature about the number of species in the group (reviewed by McKay  
102 and Zink 2015), but most modern taxonomic treatments have recognized six species of ground-finches  
103 (Lack 1947; Rising et al. 2011). However, based on genomic evidence (Lamichhaney et al. 2015) and  
104 some vocal and behavioral data, three subspecies were recently elevated to species rank, bringing the total  
105 number of recognized species to nine (Remsen et al. 2017).

106

107 In a provocative recent paper, however, McKay and Zink (2015) offered an intriguing alternative  
108 perspective on the taxonomy and evolution of ground-finches (see also Zink 2002). These authors boldly  
109 argued that morphological evidence for the existence of multiple species of *Geospiza* is lacking, and they  
110 presented the iconoclastic argument that different phenotypes should be considered transient ecomorphs

111 within a single species. Furthermore, according to these authors, ground-finches are an appropriate model  
112 to study forces involved in geographic variation and local adaptation, but not to demonstrate the workings  
113 of speciation because in their view speciation in the group has not occurred. Instead, incipient speciation  
114 has been repeatedly stalled or reversed owing to shifting conditions affecting the strength and direction of  
115 natural selection and to ongoing gene flow, a situation they wittily referred to as “Sisyphean” evolution  
116 (McKay and Zink 2015). Because of its originality in challenging “entrenched orthodoxy regarding  
117 speciation in Darwin’s Finches”, the study by McKay and Zink (2015) was duly recognized with an award  
118 by a major ornithological organization (Cooper Ornithological Society 2016).

119  
120 A central premise of the arguments by McKay and Zink (2015) was their assertion that phenotypic  
121 discontinuities do not exist among recognized species of ground-finches (contra Lack 1947; Grant et al.  
122 1985). Although they rightly noted that “the real test of species limits is determining the extent to which  
123 specimens form multiple morphological clusters when *a priori* specimen identifications are ignored”,  
124 McKay and Zink (2015) did not formally conduct such a test. Instead, their approach illustrates three  
125 problematic issues in analyses of phenotypic data for species delimitation. In the next section we describe  
126 these issues and outline possible solutions afforded by statistical tools directly related to the basic  
127 evolutionary model underlying the use of phenotypic data in species delimitation. We then implement  
128 these solutions in a reanalysis of the morphological data on *Geospiza* ground-finches to revisit the  
129 question of whether morphological evidence supports the hypothesis that there are several species in the  
130 group.

131  
132 THREE FREQUENT ISSUES IN ANALYSES OF PHENOTYPIC DATA FOR SPECIES DELIMITATION

133  
134 1) *Graphical analyses may convey little information on phenotype frequencies crucial to assess evidence*  
135 *for multiple species.*

136

137 Many species delimitation studies rely on visual inspection of bivariate (rarely trivariate) scatter plots of  
138 phenotypic space to detect discontinuities and thus define phenotypic groups (e.g., Fig. 1 in McKay and  
139 Zink 2015). These scatter plots may offer only limited insight into the structure of character variation  
140 because visual cluttering and record overplotting hinder perception of phenotype frequencies crucial to  
141 identify groups (McLachlan 2004). We illustrate this problem with a hypothetical example in which  
142 specimens from a given locality seem to reveal no phenotypic discontinuities, with intermediate  
143 phenotypes across the range of variation (Fig. 1a); accordingly, a univariate scatter plot fails to reveal  
144 evidence of distinct phenotypic groups (Fig. 1b). The problem with scatter plots concealing crucial  
145 information (also common in two- and three-dimensional scatter plots) is revealed by a histogram of  
146 phenotype frequencies employing the same data, which reveals two distinct normal distributions (Fig. 1c).  
147 Following the model for species delimitation based on continuous phenotypic characters described above,  
148 this histogram suggests the existence of two species.

149  
150 Graphical analysis of phenotype frequencies (e.g., Fig. 1c) may be effective to detect groups when few  
151 characters are relevant (but see McLachlan and Peel 2000, page 9). However, it may be difficult to detect  
152 distinct normal distributions in phenotypic spaces defined by more than two dimensions, where complex  
153 covariance structures are likely (McLachlan 2004). Moreover, detection of phenotypic groups exclusively  
154 based on graphical analysis is potentially highly subjective and difficult to replicate, or, as stated by Karl  
155 Pearson (1894) over a century ago: "To throw the solution on the judgment of the eye in examining the  
156 graphical results is, I feel certain, quite futile". Therefore, graphical analysis of phenotype frequencies is a  
157 useful but limited tool for species delimitation.

158  
159 Recent statistical developments allow systematists to go beyond graphical analysis by using normal  
160 mixture models (NMMs, McLachlan and Peel 2000) as a formal approach to test for the existence of  
161 distinct species based on multivariate phenotypic data (Ezard et al. 2010; Guillot et al. 2012; Edwards and  
162 Knowles 2014; Kleindorfer et al. 2014). These models conceptualize phenotypic variation as a

163 combination (i.e., a mixture) of distinct normal distributions; a mixture may include one or more distinct  
164 normal distributions, representing the hypothesis of one or more species, respectively. The parameters of a  
165 NMM specifying a particular hypothesis include the means and variance-covariance matrices describing  
166 the Gaussian phenotypic distribution of each species. These parameters can be estimated using maximum  
167 likelihood from data on phenotypic measurements, without *a priori* knowledge of species limits,  
168 employing the expectation–maximization algorithm (McLachlan and Krishnan 2008). Comparison of  
169 empirical support among models representing different hypotheses is often based on the Bayesian  
170 Information Criterion (BIC; Schwarz 1978), which evaluates the likelihood of each model while adjusting  
171 for model complexity (Fraley and Raftery 2002).

172

173 2) *Reduction of dimensionality via PCA may exclude important characters for species delimitation.*

174

175 Species delimitation studies often begin analyses by reducing the dimensionality of phenotypic space,  
176 typically via principal component analysis (PCA) or related procedures (McLachlan 2004; Ezard et al.  
177 2010), and then focus attention on few principal components accounting for most of the variation in the  
178 data. For example, McKay and Zink (2015) focused on three principal components explaining 99% of the  
179 variation in six morphological characters of *Geospiza* ground-finches (see their Fig. 1). This use of PCA  
180 and related procedures in taxonomy was suggested decades ago (Sneath and Sokal 1973) and is still  
181 prescribed nowadays (e.g., Ezard et al. 2010). However, there is no reason to believe that principal  
182 components accounting for most of the variation in a dataset are most useful for group discrimination  
183 (Chang 1983).

184

185 To illustrate the problem of reducing dimensionality to the principal components accounting for most of  
186 the variation, we use a hypothetical example based on two phenotypically distinct species, each  
187 represented by a bivariate normal distribution (Fig. 2a). The first principal component of the mixture of  
188 these two distributions explains >99% of the variation and, yet, it is useless to distinguish the two species



189 (Fig. 2b). In contrast, the second principal component accounts for <1% of the variation and perfectly  
190 discriminates species (Fig. 2c). This example is bivariate for simplicity, but the statistical principle applies  
191 to mixtures of two normal distributions in any number of dimensions (Chang 1983). We stress that the  
192 problem at hand is not rotation of the data using PCA or related procedures, because such rotation may  
193 serve a number of useful purposes; rather, the problem is employing the amount of phenotypic variance  
194 explained by each principal component as a criterion to judge its usefulness to distinguish phenotypic  
195 groups (Chang 1983).

196  
197 Although alternatives to PCA and related approaches for dimensionality reduction should be regularly  
198 considered in analysis aiming to detect groups in multivariate space (McLachlan and Peel 2000;  
199 McLachlan 2004), they are rarely implemented in species delimitation studies. For example, one may  
200 reduce dimensionality based on *a priori* considerations about which set of characters may be best to  
201 diagnose particular species. In particular, when *a priori* information about specific traits separating species  
202 is available (e.g. original species descriptions), one should favor analyzing variation in such traits; far  
203 from being circular (McKay and Zink 2015), it is only natural that one should critically examine evidence  
204 for species limits precisely in the dimensions in which such limits are hypothesized to exist (see also  
205 Remsen 2010; Patten and Remsen 2017). Alternatively, one may use methods that aim to find the set of  
206 variables (phenotypic traits) that best discriminates groups in a NMM, with no *a priori* information about  
207 groups (Raftery and Dean 2006; Maugis et al. 2009a; Maugis et al. 2009b).

208

209 3) *Differences in central tendency are not evidence of distinct phenotypic distributions.*

210

211 Distinct normal distributions in quantitative characters constitute evidence for the existence of distinct  
212 species, but differences in central tendency between groups of individuals do not. This issue has been  
213 pointed out previously (e.g., Mayr et al. 1953; Luckow 1995; Patten and Unitt 2002), but seems to be  
214 ignored when statistical procedures to investigate differences in central tendency (e.g., t-tests, analysis of

215 variance, Cohen's  $d$ ) are advanced as potentially valid tools to evaluate species boundaries (e.g., Simpson  
216 1951; Henderson 2006; Tobias et al. 2010). McKay and Zink (2015, page 695 and their Fig. 2) have done  
217 as much by suggesting that statistical differences in average phenotypes between allopatric island  
218 populations of ground-finches could be equated to distinct morphological groups which, in turn, would  
219 have to be recognized as species.

220  
221 Because this issue seems to commonly afflict assessments of species limits between allopatric forms  
222 (Tobias et al. 2010; McKay and Zink 2015), we illustrate it with a hypothetical example of two allopatric  
223 populations. Grouping specimens from these populations according to collection localities (e.g., two  
224 islands) reveals statistically significant differences in the central tendency of phenotypes (Fig. 3a). Yet,  
225 there is no evidence that phenotypic variation across specimens from the two populations is best described  
226 by more than a single normal distribution (Fig. 3b). Therefore, there is no evidence for more than one  
227 species in the sample of specimens regardless of differences in average phenotypes. This illustration  
228 focuses on groups of specimens defined by geography (i.e., allopatric populations), but the issue may  
229 affect comparisons involving groups of specimens defined by time (i.e., allochronic populations; Simpson  
230 1951) or by any other criterion.

231  
232 The solution to the problem is simple: do not treat phenotypic differences in central tendency as evidence  
233 for the existence of distinct phenotypic groups and, therefore, distinct species. No matter how statistically  
234 significant, even very large effect sizes are not germane in light of the basic model for species delimitation  
235 based on quantitative phenotypic characters. In light of this model, the focus of analysis should be on  
236 determining the number of normal distributions needed to describe phenotypic variation among  
237 specimens, as well as on estimating the parameters of those distributions (e.g., means and variance-  
238 covariance matrices). Indeed, strong evidence may exist for more than one distinct normal distribution in  
239 the absence of differences in central tendency (Hennig 2010), suggesting biologically meaningful

240 differences between species in the variance of phenotypic traits (Supplementary Material, Appendix 1). As  
241 explained above, NMMs are a useful tool to test for distinct normal distributions.

242

#### 243 ARE THERE PHENOTYPICALLY DISTINCT GROUPS OF GROUND-FINCHES?

244 We examined phenotypic variation among *Geospiza* ground-finches by analyzing data from six  
245 morphological measurements of museum specimens (wing length, tail length, tarsus length, bill length,  
246 bill width, and bill depth) taken on adult males by H. S. Swarth for his monographic revision of the birds  
247 of the Galapagos (Swarth 1931). These were the same data employed by McKay and Zink (2015), which  
248 we use here with permission from the California Academy of Sciences; our sample sizes differ from those  
249 of the earlier study (501 vs. 486 male individuals) because we excluded a few individuals that were  
250 duplicated in the original dataset. The data we employed and the R code used to conduct the analyses  
251 described below are available as supplementary material (Appendices 2 and 3, respectively).

252

253 We asked how many distinct groups of ground-finches exist in the Galapagos using morphological data  
254 from specimens collected across the archipelago (total 18 islands). To define the morphological space for  
255 this analysis, we followed McKay and Zink (2015) and used PCA on the covariance matrix of log-  
256 transformed data. Rather than examining evidence for species limits using only the first three principal  
257 components accounting for >99% of the variation (McKay and Zink 2015), we used the R package  
258 *clustvarsel* (Scrucca and Raftery 2004) to reduce the dimensionality of the data by selecting the set of  
259 principal components most useful for group discrimination in NMMs, without *a priori* information about  
260 groups (Raftery and Dean 2006; Maugis et al. 2009a; Maugis et al. 2009b). We used the R package *mclust*  
261 5.0 (Scrucca et al. 2016) to fit a wide range of NMMs. At one extreme, NMMs assuming one  
262 morphological group represented the Sisyphean evolution hypothesis that there is a single species of  
263 ground-finch (McKay and Zink 2015). Toward the opposite end, NMMs assuming up to 30 distinct  
264 morphological groups represented hypotheses alluded to by McKay and Zink (2015) when they suggested  
265 ground-finches may comprise “dozens of cluster species”, or “1 or 6 or 30 species” (p. 695). We also

266 fitted NMMs specifying the six (Lack 1947) or nine (Lamichhaney et al. 2015; Remsen et al. 2017)  
267 species recognized by alternative taxonomic treatments of *Geospiza*, using the original specimen  
268 identifications in Swarth's data updated to reflect changes in nomenclature. We used the Bayesian  
269 Information Criterion (BIC; Schwarz 1978) to measure empirical support for different NMMs (Fraley and  
270 Raftery 2002) and thereby explicitly evaluated the hypothesis that there is only one species of ground-  
271 finch (McKay and Zink 2015) relative to hypotheses that there are several species in the group (Lack  
272 1947; Lamichhaney et al. 2015; Remsen et al. 2017).

273  
274 We found the first four principal components to be most useful for group discrimination; NMMs ignoring  
275 the fourth principal component, although it explained only 0.006% of the morphological variance, had  
276 substantially less empirical support ( $\Delta\text{BIC} \geq 55$ ) than those including it. Therefore, in contrast to McKay  
277 and Zink (2015), we did not discard the fourth principal component for analysis. The models specifying  
278 seven and eight distinct morphological groups of ground-finches received the strongest support ( $\Delta\text{BIC} \leq$   
279 1.26). Support for all other models was considerably lower ( $\Delta\text{BIC}$  in all cases  $>20$ ; Fig. 4). In turn, the  
280 model with the lowest support represented the Sisyphean evolution hypothesis proposing no distinct  
281 morphological groups of ground-finches (i.e., that there is a single group; McKay and Zink 2015), which  
282 had a 500 BIC difference to the second-worse model and  $> 821$  BIC difference to the two best models.  
283 Relative to the best models, those specifying groupings consistent with taxonomy recognizing six or nine  
284 species were weakly supported (Fig. 4), considering differences in BIC scores greater than 6 are typically  
285 regarded as strong or very strong evidence against models with lower support (Kass and Raftery 1995). In  
286 sum, the data provided poor empirical support for the hypothesis that ground-finches consist of only one  
287 species (McKay and Zink 2015) and strongly supported hypotheses of several morphologically distinct  
288 groups (Fig. 5, Supplementary Fig. 1); however, those groups did not readily align with existing  
289 taxonomic treatments of *Geospiza* (Fig. 6, Supplementary Fig. 2).

290

291 Despite their comparatively low empirical support, models specifying six or nine morphological groups  
292 according to taxonomic treatments of *Geospiza* (Lack 1947; Remsen et al. 2017) were partially consistent  
293 with the best models (Fig. 6 and Supplementary Fig. 2). For example, in the best models, all specimens of  
294 two of the nine currently recognized species (*G. scandens*, *G. septentrionalis*) were assigned to two  
295 respective morphological groups which included few or no specimens of other species (Fig. 6;  
296 Supplementary Fig. 2). Discrepancies between our analysis and current taxonomy were most evident in  
297 cases such as those of (1) *G. propinqua*, *G. conirostris* and *G. fortis*, which were assigned to three, three  
298 (or two) and four morphological groups, respectively, or (2) *G. fuliginosa* and *G. acutirostris*, in which all  
299 specimens were assigned to the same group to the exclusion of nearly all specimens of other species. In  
300 addition, some morphological groups included specimens of multiple species (e.g., morphological group 1  
301 contained specimens identified as *G. propinqua*, *G. fortis*, *G. magnirostris*, and *G. conirostris*). Part of the  
302 lack of agreement between the morphological groups we detected and groups recognized by taxonomy  
303 may be accounted for by considering that species may be told apart by phenotypic characters different  
304 from those we considered. For example, *G. fuliginosa* and *G. acutirostris* are indistinguishable in our  
305 analysis, but are distinct given subtle differences in bill profile and marked differences in songs (Grant and  
306 Grant 2008). Likewise, some of the discrepancies with current taxonomy (Remsen et al. 2017) involved  
307 cases in which species delimitation was not based on morphology, but rather resulted from recent genomic  
308 analyses revealing that phenotypically similar populations are distantly related (Lamichhaney et al. 2015).  
309 This likely explains why our analysis did not fully discriminate some species pairs in the morphological  
310 space we examined (*G. conirostris* vs. *G. propinqua*, *G. difficilis* vs. *G. septentrionalis*), although they may  
311 be more distinct in other phenotypic spaces including bill profile and song as well as behavior (Grant et al.  
312 2000; Grant and Grant 2002). Also, we assumed that specimen identifications in the data set we analyzed  
313 were faultless; thus, part of the apparent mismatch between morphological groups detected in our analyses  
314 and taxonomy may reflect identification errors. Evaluating this possibility would require detailed  
315 examinations of individual specimens beyond the scope of our work.

316

317 Geographic context is an important consideration in assessments of species limits using phenotypic traits.  
318 Under a wide range of species definitions (*sensu de* Queiroz 1998), distinct phenotypic groups among  
319 sympatric individuals are readily accepted as evidence for the existence of distinct species (Mayr 1992;  
320 Mallet 2008), whereas distinct phenotypic groups corresponding to non-sympatric populations may be less  
321 readily accepted as evidence of distinct species because they may reflect within-species differentiation due  
322 to geographic isolation or local adaptation (Zapata and Jiménez 2012). The morphological groups of  
323 ground-finches we detected (Fig. 5, Supplementary Fig. 1) cannot be interpreted to reflect within-species,  
324 among-island variation because these groups occurred on multiple islands and were sympatric with other  
325 groups; all of the morphological groups identified in the best NMMs were widely distributed across the  
326 Galapagos Archipelago (median = 8.5 or 9.0, range 3-14 islands per group; Table 1 and Supplementary  
327 Table 1) and most islands harbored several groups (up to 6 in Santiago and 7 in Santa Cruz; Fig. 7 and  
328 Supplementary Figure 3). Importantly, almost all morphological groups co-occurred with each other in at  
329 least one island; the only exception was morphological group 3 in one of the models, which co-occurred  
330 with four out of the other seven groups (Table 1 and Supplementary Table 1). McKay and Zink (2015)  
331 indicated that different morphs of ground-finches exist within islands and argued that if such morphs were  
332 treated as species, then one would need to recognize dozens of species in the group; our analysis suggests  
333 this is not the case given the occurrence of all morphological groups in multiple islands.

334  
335 At this point we note that because the specimens we analyzed were collected several decades ago (Swarth  
336 1931), they may not faithfully reflect patterns in morphological variation nor the geographic distributions  
337 of morphological groups in the present. This is because over the past century, ground-finch populations  
338 have experienced a few colonization and extinction events, changes in the degree of morphological  
339 differentiation among populations due to natural and human-mediated hybridization, and bouts of  
340 selection in shifting directions over multiple generations in association with environmental variation in  
341 space and time (Harris 1973; De León et al. 2011; Grant and Grant 2014). Thus, we refrain from  
342 additional discussions about species limits involving comparisons of historical morphological data with

343 contemporary evidence (e.g., genomics; Lamichhaney et al. 2015). Nonetheless, our analyses serve to  
344 demonstrate that statistically distinct morphological groups of ground-finches existed in the past, and we  
345 strongly suspect they still exist in the present. Accordingly, we suggest that the burden of proof for  
346 systematists proposing to lump ground-finches into a single species based on morphological data is on  
347 showing that distinct groups do not longer exist.

348

#### 349 CONCLUSIONS; OR, ATLANTEAN EVOLUTION IN DARWIN'S FINCHES

350 Our reanalysis of morphological data pointed strongly to the existence of several groups of phenotypically  
351 distinct *Geospiza* ground-finches based only on six linear morphological measurements. In addition, we  
352 found evidence of distinct phenotypes in geographic scenarios (i.e., sympatry within islands) where one  
353 should not expect them if populations had not achieved evolutionary independence. Specifically, because  
354 the variation in quantitative morphological traits we examined is polygenic (Abzhanov et al. 2004;  
355 Abzhanov et al. 2006; Lamichhaney et al. 2015; Chaves et al. 2016; Lamichhaney et al. 2016) and not  
356 caused by differences in sex or age (we restricted analyses to adult males), the existence of distinct  
357 phenotypic groups in areas where populations come into contact implies there are likely several species of  
358 ground-finches. Therefore, we contend that ground-finches are not an example of Sisyphean evolution  
359 (McKay and Zink 2015), a term that could well apply to other systems in nature (Seehausen 2006; Nosil et  
360 al. 2009; Rudman and Schluter 2016). Instead, evolutionary forces maintaining populations of ground-  
361 finches apart are likely in place, just as in Greek mythology Atlas prevents the merging of the Earth and  
362 the sky with his shoulders. Ground-finches thus likely represent an example of what one might call  
363 “Atlantean evolution”. One, of course, does not need a new term to refer to speciation, but thinking of  
364 Atlas brings to mind *atlas*, a collection of maps, which reminds one of the central role of geography in  
365 speciation and in the basic model underlying species delimitation based on phenotypic variation.  
366 The question of exactly how many species of Darwin's ground-finches are there remains open and  
367 requires further attention to morphology, including careful scrutiny of discrepancies between  
368 morphological variation and taxonomy (e.g., Fig. 6). In addition, morphological variation should be

369 further examined in light of biological factors including additional phenotypic characters, ecological  
370 niches, mating behavior, population dynamics, and patterns of genetic and genomic variation among  
371 populations (Grant 1999; Huber et al. 2007; Grant and Grant 2008; Farrington et al. 2014; Grant and Grant  
372 2014; Lamichhaney et al. 2015; McKay and Zink 2015). Fruitful discussions about species limits in the  
373 group would likely start by addressing some of the additional thought-provoking arguments advanced by  
374 McKay and Zink (2015) that we did not touch on and which are beyond the scope of our work (e.g., the  
375 extent to which morphological groups are stable lineages over time or the evidence for the existence of  
376 distinct gene pools). Any such discussions, however, as well as discussions over species delimitation in  
377 other organisms, should bear in mind that phenotypic evidence for species limits is best assessed using  
378 statistical approaches appropriately grounded on evolutionary models.

379

#### 380 OUTLOOK

381 We do not claim that the approaches used here to analyze phenotypic data for species delimitation are free  
382 of problems. Issues such as estimation of the number of groups in NMMs (McLachlan and Peel 2000;  
383 McLachlan and Rathnayake 2014) or how to select variables for NMM analyses of multidimensional  
384 datasets (Poon et al. 2013) are critical areas of active research in statistics in which progress remains to be  
385 made. Despite these issues, however, we argue that the statistical tools we used are appropriate because  
386 they are directly related to the basic evolutionary model underlying species delimitation using phenotypic  
387 data (Fisher 1918). Moreover, these tools allow systematists to go beyond fairly limited graphical analysis,  
388 and to break free from problems resulting from reduction of dimensionality using PCA or related  
389 approaches and from comparisons of measurements of central tendencies. The value of embracing  
390 approaches with a solid theoretical basis despite limitations in their implementation in systematics is clear  
391 considering other developments in the field in which theory predated robust methodologies that  
392 subsequently blossomed. Such developments include the use of statistical methods to study species limits  
393 among fossil populations (Newell 1956), the application of probabilistic models to infer phylogenetic trees



394 (Felsenstein 1981), time-calibration of molecular phylogenies (Kishino and Hasegawa 1990), and the  
395 estimation of species trees from gene trees (Maddison 1997).

396

397 Practical approaches to fit NMMs without *a priori* information about species limits offer a fresh  
398 perspective in inferences available to systematists. In the absence of these tools, it seemed reasonable to  
399 argue that species limits should be based on fixed phenotypic differences because continuous variation  
400 could only be subdivided using subjective criteria (Cracraft 1989; Davis 1997). Accordingly, overlap of  
401 phenotypic ranges has been conventionally stressed as a criterion to suggest samples of individuals are  
402 conspecific (e.g., Simpson 1951; Davis and Heywood 1963; Zink 2002; McKay and Zink 2015).

403 However, overlap in phenotypic ranges under the framework offered by NMMs is not relevant for species  
404 delimitation because (1) one may find strong empirical support for models in which the phenotypic ranges  
405 of distinct normal distributions overlap (e.g., Fig. 1 and 5), and (2) absence of range overlap does not  
406 imply strong empirical support for models with more than a single species (e.g., Fig. 3). Critically,  
407 absence of range overlap need not imply a phenotypic gap (i.e., a phenotypic region with low frequency of  
408 individuals) because continuous phenotypic variation can be arbitrarily split into mutually exclusive parts  
409 regardless of phenotype frequencies. On the other hand, although true phenotypic gaps (along with  
410 multimodality in phenotypic distributions) are sufficient to suggest species boundaries (Zapata and  
411 Jiménez 2012; Mallet 2013), they are not necessary to demonstrate such boundaries exist because NMMs  
412 specifying more than one species may be strongly supported in the absence of phenotypic gaps. An  
413 example of support for more than one normal distribution in the absence of phenotypic gaps was provided  
414 at the inception of NMMs: Karl Pearson inferred two groups among specimens of the shore crab  
415 (*Carcinus maenas*) from the Bay of Naples, even though the mixture of the groups was not bimodal and  
416 therefore they were not separated by a gap (Pearson 1894). Moreover, Pearson examined the possibility of  
417 inferring the existence of groups with different phenotypic variances but identical phenotypic means,  
418 which are by definition not separated by a gap (Supplementary Material Appendix 1).

419

420 To conclude, we note that the criteria for species delimitation discussed above are relevant in the context  
421 of ideas about the reality of species. In particular, it has been argued that if the hypothesis that species are  
422 real entities in nature is correct, then biological diversity should be a patchwork of phenotypic clusters  
423 delineated by gaps (Coyne and Orr 2004; Barraclough and Humphreys 2015). This prediction, however,  
424 would not follow from the hypothesis that species are real if, as we argue, phenotypic gaps are not  
425 necessary criteria for species delimitation. In other words, species may be real entities in nature even if  
426 phenotypic gaps are not major elements structuring biological diversity. Because statistical approaches  
427 related to NMMs now allow systematists to make unprecedented formal inferences about the existence of  
428 species even if they overlap in phenotypic space, they constitute particularly useful tools to describe the  
429 structure of biological diversity, a necessary step to understand the evolutionary processes that generated  
430 it.

431

#### 432 ACKNOWLEDGEMENTS

433 We thank the California Academy of Sciences (Jack Dumbacher) for allowing us to use and publish  
434 morphological data from H. S. Swarth's archive. Bailey McKay kindly provided tabulated data. We thank  
435 Peter Grant, Van Remsen, Elizabeth Spriggs, Peter Stevens, and members C.D. Cadena's laboratory group  
436 for discussion and helpful comments on the manuscript.

437

438

#### 439 REFERENCES

- 440 Abzhanov A, Kuo WP, Hartmann C, Grant BR, Grant PR, Tabin CJ. 2006. The calmodulin pathway and  
441 evolution of elongated beak morphology in Darwin's finches. *Nature*, 442:563-567.
- 442 Abzhanov A, Protas M, Grant BR, Grant PR, Tabin CJ. 2004. *Bmp4* and morphological variation of beaks  
443 in Darwin's finches. *Science*, 305:1462-1465.

- 444 Allmon WD. 2016. Studying species in the fossil record: A review and recommendations for a more  
445 unified approach. In: Allmon WD, Yacobucci MM editors. Species and speciation in the fossil  
446 record. Chicago, IL, USA, University of Chicago Press, p. 59-120.
- 447 Barraclough TG, Humphreys AM. 2015. The evolutionary reality of species and higher taxa in plants: a  
448 survey of post-modern opinion and evidence. *New Phytologist*, 207:291-296.
- 449 Bowman R. 1961. Morphological differentiation and adaptation in the Galapagos finches. University of  
450 California Publications in Zoology, 58:1-302.
- 451 Camargo A, Sites JW, Jr. 2013. Species delimitation: A decade after the renaissance. In: Pavlinov IY  
452 editor. *The Species Problem: Ongoing Issues*, InTech DOI: 10.5772/3313, p. 225-247.
- 453 Carstens B, Pelletier TA, Reid NM, Satler JD. 2013. How to fail at species delimitation. *Molecular*  
454 *Ecology*, 22:4369-4383.
- 455 Chang W-C. 1983. On using principal components before separating a mixture of two multivariate normal  
456 distributions. *Applied Statistics*, 32:267-275.
- 457 Chaves JA, Cooper EA, Hendry AP, Podos J, De León LF, Raeymaekers JAM, Macmillan WO, Uy JAC.  
458 2016. Genomic variation at the tips of the adaptive radiation of Darwin's finches. *Molecular*  
459 *Ecology*, 25:5282-5295.
- 460 Cooper Ornithological Society. 2016. Katma Award 2015, to Bailey McKay and Robert Zink. *Condor*,  
461 118:209-210.
- 462 Coyne JA, Orr HA. 2004. *Speciation*. Sunderland, Massachusetts, Sinauer Associates.
- 463 Cracraft J. 1989. Speciation and its ontology: the empirical consequences of alternative species concepts  
464 for understanding patterns and processes of differentiation. In: Otte D, Endler JA editors. *Speciation*  
465 *and its consequences*. Sunderland, Massachusetts, Sinauer Associates, p. 28-59.
- 466 Davis JI. 1997. Evolution, evidence and the role of species concepts in phylogenetics. *Systematic Botany*,  
467 22:373-403.
- 468 Davis PH, Heywood V. 1963. *Principles of angiosperm taxonomy*. Princeton, NJ, USA, D. van Nostrand  
469 Co.

- 470 De León LF, Raeymaekers JAM, Bermingham E, Podos J, Herrel A, Hendry AP. 2011. Exploring  
471 possible human influences on the evolution of Darwin's finches. *Evolution*, 65:2258-2272.
- 472 de Queiroz K. 1998. The general lineage concept of species, species criteria, and the process of speciation.  
473 In: Howard DJ, Berlocher SH editors. *Endless forms: species and speciation*. New York, Oxford  
474 University Press, p. 57-75.
- 475 Edwards DL, Knowles LL. 2014. Species detection and individual assignment in species delimitation: can  
476 integrative data increase efficacy? *Proceedings of the Royal Society of London B*, 281:20132765.
- 477 Ezard THG, Pearson PN, Purvis A. 2010. Algorithmic approaches to aid species' delimitation in  
478 multidimensional morphospace. *BMC Evolutionary Biology*, 10:175.
- 479 Farrington HL, Lawson LP, Clark CM, Petren K. 2014. The evolutionary history of Darwin's finches:  
480 speciation, gene flow, and introgression in a fragmented landscape. *Evolution*, 68:2932-2944.
- 481 Felsenstein J. 1981. Evolutionary trees from DNA sequences: a maximum likelihood approach. *Journal of*  
482 *Molecular Evolution*, 17:368-376.
- 483 Fisher RA. 1918. The correlation between relatives on the supposition of Mendelian inheritance.  
484 *Transactions of the Royal Society of Edinburgh*, 52:399-433.
- 485 Fraley C, Raftery AE. 2002. Model-based clustering, discriminant analysis, and density estimation.  
486 *Journal of the American Statistical Association*, 97:611-631.
- 487 Fraley C, Raftery AE, Murphy TB, Scrucca L. 2012. *mclust Version 4 for R: Normal Mixture Modeling*  
488 *for Model-Based Clustering, Classification, and Density Estimation*. Technical Report No. 597.  
489 Department of Statistics, University of Washington.
- 490 Fujita MW, Leaché AD, Burbrink FT, McGuire JA, Moritz C. 2012. Coalescent-based species  
491 delimitation in an integrative taxonomy. *Trends in Ecology and Evolution*, 27:480-488.
- 492 Futuyma DJ. 2013. *Evolution*, third edition. Sunderland, Massachusetts, Sinauer Associates.
- 493 Grant BR, Grant PR. 2002. Simulating secondary contact in allopatric speciation: an empirical test of  
494 premating isolation. *Biological Journal of the Linnean Society*, 76:545-556.

- 495 Grant PR. 1999. Ecology and evolution of Darwin's finches. Princeton, New Jersey, USA, Princeton  
496 University Press.
- 497 Grant PR, Abbott I, Schluter D, Curry RL, Abbott LK. 1985. Variation in the size and shape of Darwin's  
498 finches. *Biological Journal of the Linnean Society*, 25:1-39.
- 499 Grant PR, Grant BR. 2008. How and why species multiply: the radiation of Darwin's finches. Princeton,  
500 New Jersey, USA, Princeton University Press.
- 501 Grant PR, Grant BR. 2014. 40 Years of Evolution: Darwin's Finches on Daphne Major Island. Princeton,  
502 New Jersey, USA, Princeton University Press.
- 503 Grant PR, Grant BR, Petren K. 2000. The allopatric phase of speciation: the sharp-beaked ground finch  
504 (*Geospiza difficilis*) on the Galápagos islands. *Biological Journal of the Linnean Society*, 69:287-  
505 317.
- 506 Guillot G, Renaud S, Ledevin R, Michaux J, Claude J. 2012. A unifying model for the analysis of  
507 phenotypic, genetic, and geographic data. *Systematic Biology*, 61:897-911.
- 508 Harris MP. 1973. The Galápagos avifauna. *Condor*, 75:265-278.
- 509 Henderson A. 2006. Traditional morphometrics in plant systematics and its role in palm systematics.  
510 *Botanical Journal of the Linnean Society*, 151:103-111.
- 511 Hennig C. 2010. Methods for merging Gaussian mixture components. *Advances in Data Analysis and*  
512 *Classification*, 4:3-34.
- 513 Huber SK, De León LF, Hendry AP, Bermingham E, Podos J. 2007. Reproductive isolation of sympatric  
514 morphs in a population of Darwin's finches. *Proceedings of the Royal Society of London B*,  
515 274:1709-1714.
- 516 Kass RE, Raftery AE. 1995. Bayes factors. *Journal of the American Statistical Association*, 90:773-795.
- 517 Kishino H, Hasegawa M. 1990. Converting distance to time: Application to human evolution. *Methods in*  
518 *Enzymology*, 183:550-570.
- 519 Kleindorfer S, O'Connor JA, Dudaniec RY, Myers SA, Robertson J, Sulloway FJ. 2014. Species collapse  
520 via hybridization in Darwin's tree finches. *American Naturalist*, 183:325-341.

- 521 Lack D. 1947. Darwin's Finches. New York, Cambridge University Press.
- 522 Lamichhaney S, Berglund J, Almén MS, Maqbool K, Grabherr M, Martinez-Barrio A, Promerová M,  
523 Rubin C-J, Wang C, Zamani N, *et al.* 2015. Evolution of Darwin's finches and their beaks revealed  
524 by genome sequencing. *Nature*, 518:371-375.
- 525 Lamichhaney S, Han F, Berglund J, Wang C, Almén MS, Webster MT, Grant BR, Grant PR, Andersson  
526 L. 2016. A beak size locus in Darwin's finches facilitated character displacement during a drought.  
527 *Science*, 352:470-474.
- 528 Luckow M. 1995. Species concepts: assumptions, methods, and applications. *Systematic Botany*, 20:589-  
529 518.
- 530 Maddison WP. 1997. Gene trees in species trees. *Systematic Biology*, 463:523-536.
- 531 Mallet J. 2008. Hybridization, ecological races and the nature of species: empirical evidence for the ease  
532 of speciation. *Philosophical Transactions of the Royal Society of London B*, 363:2971-2986.
- 533 Mallet J. 2013. Species, concepts of. In: Levin SA editor. *Encyclopedia of Biodiversity*. Volume 6.  
534 Waltham, Mass, Academic Press, p. 679-691.
- 535 Maugis C, Celeux G, Martin-Magniette M-L. 2009a. Variable selection for clustering with Gaussian  
536 mixture models. *Biometrics*, 65:701-709.
- 537 Maugis C, Celeux G, Martin-Magniette M-L. 2009b. Variable selection in model-based clustering: A  
538 general variable role modeling. *Computational Statistics and Data Analysis*, 53:3872-3882.
- 539 Mayr E. 1992. A local flora and the biological species concept. *American Journal of Botany*, 79:222-238.
- 540 Mayr E, Linsley EG, Usinger RL. 1953. *Methods and Principles of Systematic Zoology*. New York,  
541 McGraw-Hill.
- 542 McDade LA. 1995. Species concepts and problems in practice: insights from botanical monographs.  
543 *Systematic Botany*, 20:606-622.
- 544 McKay BD, Zink RM. 2015. Sisyphean evolution in Darwin's finches. *Biological Reviews*, 90:689-698.
- 545 McLachlan G, Krishnan T. 2008. *The EM Algorithm and Extensions*, second edition. Hoboken, NJ, USA,  
546 John Wiley and Sons.

- 547 McLachlan G, Peel DA. 2000. Finite mixture models. Hoboken, NJ, USA, Wiley Series in Probability and  
548 Statistics, John Wiley and Sons.
- 549 McLachlan GJ. 2004. Discriminant analysis and statistical pattern recognition. Hoboken, NJ, USA, Wiley  
550 Series in Probability and Statistics, John Wiley and Sons.
- 551 McLachlan GJ, Rathnayake S. 2014. On the number of components in a Gaussian mixture model. WIREs  
552 Data Mining Knowledge and Discovery, 4:341-355.
- 553 Miller W. 2016. The species problem: concepts, conflicts, and patterns preserved in the fossil record. In:  
554 Allmon WD, Yacobucci MM editors. Studying species in the fossil record: A review and  
555 recommendations for a more unified approach. Chicago, IL, USA, University of Chicago Press, p.  
556 28-58.
- 557 Moczek AP, Emlen DJ. 1999. Proximate determination of male horn dimorphism in the beetle  
558 *Onthophagus taurus* (Coleoptera: Scarabaeidae). Journal of Evolutionary Biology, 12:27-37.
- 559 Newell ND. 1956. Fossil populations. In: Sylvester-Bradley PC editor. The species concept in  
560 paleontology: A symposium. London, UK, London Systematics Association, p. 63-82.
- 561 Nosil P, Harmon LJ, Seehausen O. 2009. Ecological explanations for (incomplete) speciation. Trends in  
562 Ecology and Evolution, 24:145-156.
- 563 Padial JM, Miralles A, De la Riva I, Vences M. 2010. The integrative future of taxonomy. Frontiers in  
564 Zoology, 7:216.
- 565 Patten MA, Remsen JV, Jr. 2017. Complementary roles of phenotype and genotype in subspecies  
566 delimitation. Journal of Heredity, in press:doi:10.1093/jhered/esx1013.
- 567 Patten MA, Unitt P. 2002. Diagnosability versus mean differences of sage sparrow subspecies. Auk,  
568 119:26-35.
- 569 Pearson K. 1894. Contributions to the theory of mathematical evolution. Philosophical Transactions of the  
570 Royal Society of London A, 185:71-110.
- 571 Poon LKM, Zhang NL, Liu T, Liu AH. 2013. Model-based clustering of high-dimensional data: Variable  
572 selection versus facet determination. International Journal of Approximate Reasoning, 54:196-215.

- 573 Raftery AE, Dean N. 2006. Variable selection for model-based clustering. *Journal of the American*  
574 *Statistical Association*, 101:168-178.
- 575 Remsen JV, Jr. 2010. Subspecies as a meaningful taxonomic rank in avian classification. *Ornithological*  
576 *Monographs*, 67:62-78.
- 577 Remsen JV, Jr., Areta JI, Cadena CD, Claramunt S, Jaramillo A, Pacheco JF, Pérez-Emán J, Robbins MB,  
578 Stiles FG, Stotz DF, *et al.* 2017. A classification of the bird species of South America, version  
579 [date]. American Ornithologists' Union. <http://www.museum.lsu.edu/~Remsen/SACCBaseline.htm>.
- 580 Rieseberg LH, Wood TE, Baack EJ. 2006. The nature of plant species. *Nature*, 440:524-527.
- 581 Rising JD, Jaramillo A, Copete JL, Ryan PG, Madge SC. 2011. Family Emberizidae (Buntings and New  
582 World Sparrows). In: del Hoyo J, Elliott A, Christie DA editors. *Handbook of the Birds of the*  
583 *World*. Vol. 16. Tanagers to New World Blackbirds. Barcelona, Lynx Edicions, p. 428-683.
- 584 Rudman SM, Schluter D. 2016. Ecological impacts of reverse speciation in threespine stickleback. *Current*  
585 *Biology*, 26:490-495.
- 586 Sangster G. 2014. The application of species criteria in avian taxonomy and its implications for the debate  
587 over species concepts. *Biological Reviews*, 89:199-214.
- 588 Schwarz G. 1978. Estimating the dimension of a model. *Annals of Statistics*, 6:461-464.
- 589 Scrucca L, Fop M, Murphy TB, Raftery AE. 2016. mclust 5: Clustering, classification and density  
590 estimation using Gaussian finite mixture models. *The R Journal*, 8:289-317.
- 591 Scrucca L, Raftery AE. 2004. clustvarsel: A package implementing variable selection for model-based  
592 clustering in R. Preprint available on arXiv <https://arxiv.org/abs/1411.0606>.
- 593 Seehausen O. 2006. Conservation: losing biodiversity by reverse speciation. *Current Biology*, 16:R334-  
594 R337.
- 595 Simpson GG. 1951. The species concept. *Evolution*, 5:285-298.
- 596 Sites JW, Jr., Marshall JC. 2003. Delimiting species: a Renaissance issue in systematic biology. *Trends in*  
597 *Ecology and Evolution*, 18:462-470.



- 598 Sites JW, Jr., Marshall JC. 2004. Operational criteria for delimiting species. *Annual Review of Ecology,*  
599 *Evolution and Systematics*, 35:199-227.
- 600 Smith TB. 1993. Disruptive selection and the genetic basis of bill size polymorphism in the African finch  
601 *Pyrenestes*. *Nature*, 363:618-620.
- 602 Sneath PHA, Sokal RR. 1973. *Numerical taxonomy*. San Francisco, CA, W. H. Freeman and Co.
- 603 Solís-Lemus C, Knowles LL, Ané C. 2014. Bayesian species delimitation combining multiple genes and  
604 traits in a unified framework. *Evolution*, 69:492-507.
- 605 Sukumaran J, Knowles LL. 2017. Multispecies coalescent delimits structure, not species. *Proceedings of*  
606 *the National Academy of Sciences of the USA*, 114:1607-1612.
- 607 Swarth HS. 1931. The avifauna of the Galápagos Islands. *Occasional Papers of the California Academy of*  
608 *Sciences*, 18:1-299.
- 609 Templeton AR. 2006. *Population genetics and microevolutionary theory*. Hoboken, NJ, USA, John Wiley  
610 & Sons.
- 611 Tobias JA, Seddon N, Spottiswoode CN, Pilgrim JD, Fishpool LDC, Collar NJ. 2010. Quantitative criteria  
612 for species delimitation. *Ibis*, 152:724-746.
- 613 Wiens JJ, Servedio MR. 2000. Species delimitation in systematics: inferring diagnostic differences  
614 between species. *Proceedings of the Royal Society of London B*, 267:631-636.
- 615 Zapata F, Jiménez I. 2012. Species delimitation: Inferring gaps in morphology across geography.  
616 *Systematic Biology*, 61:179-194.
- 617 Zink RM. 2002. A new perspective on the evolutionary history of Darwin's finches. *Auk*, 119:864-871.  
618

619

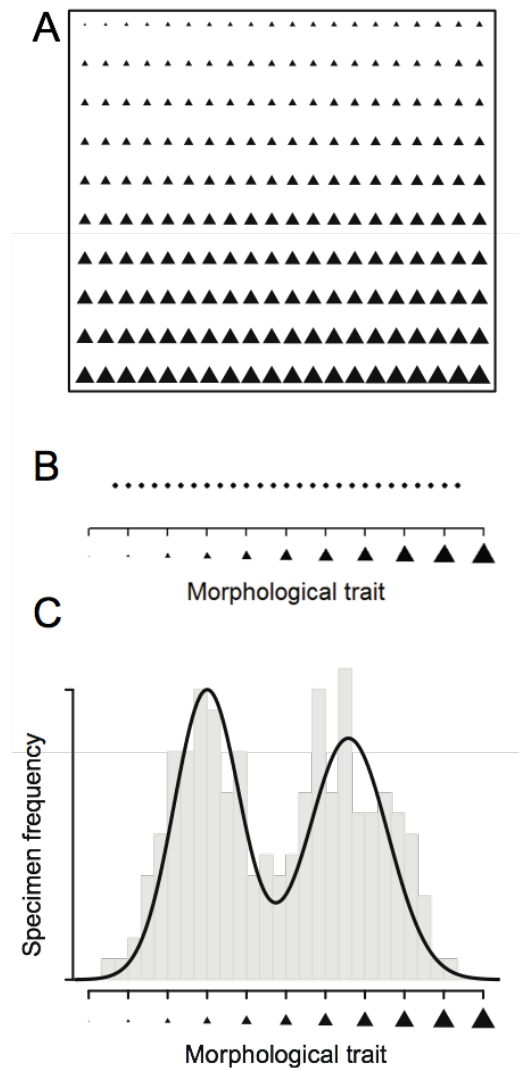

620  
621 Figure 1. Visual inspection of phenotypic data may yield limited insight regarding species limits. (A)  
622 Sample of 200 museum specimens (triangles) arranged according to a morphological phenotype (triangle  
623 size), from small in the upper left to large in the lower right. The specimens appear to form a smooth  
624 gradient with no morphological gaps. (B) Plot of specimen measurements along a single continuous axis  
625 representing the size of the morphological trait in A. At the resolution of the measurements, extreme  
626 values in the sample seem to be gradually connected by intermediate phenotypes throughout. Thus, there  
627 seem to be no obvious morphological gap, suggesting the specimens correspond to a single variable  
628 species. (C) Two distinct normal distributions are revealed by examining the frequency (gray bars) of  
629 specimen phenotypes in the sample, suggesting that specimens may correspond to two species. In fact, the  
630 sample was drawn from a mixture of two normal distributions (continuous black lines).  
631

632

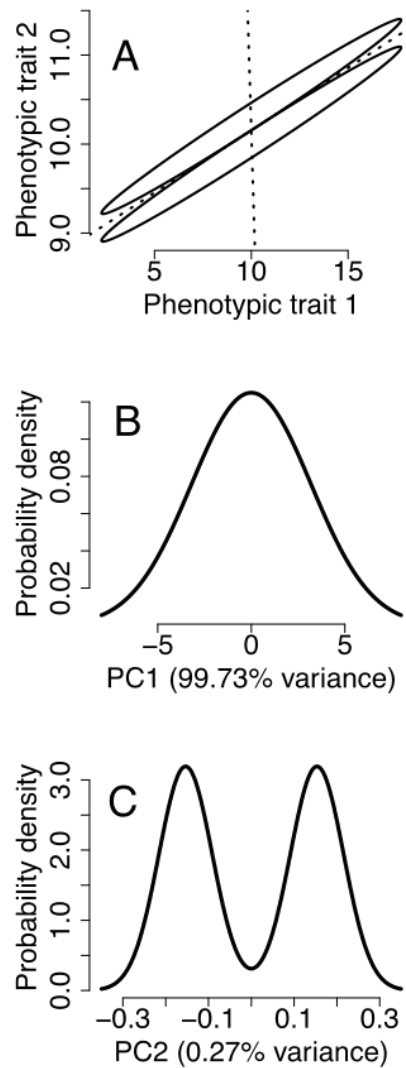

633  
634  
635  
636 Figure 2. The ability of principal components to discriminate species is not necessarily proportional to the  
637 total phenotypic variance they explain. (A) Hypothetical example of two distinct species in the space  
638 defined by two phenotypic traits. Each species is described by a bivariate normal distribution, shown as  
639 ellipses covering 95% of the individuals of each species. Dotted lines represent the two principal  
640 component axes of the normal mixture of the two species. Note that the two principal components are  
641 orthogonal, forming a right angle that may not be apparent due to the magnification of the ordinate  
642 relative to the abscissa. (B) Probability density of individuals of the two species along the first principal  
643 component (PC1). This axis is useless to discriminate the phenotypic distributions of the two species,  
644 despite the fact that it explains 99.73% of the variance. (C) Probability density of individuals of the two  
645 species along the second principal component (PC2). The phenotypes of the two species can be readily  
646 distinguished along this axis, even though it explains only 0.27% of the variance. Because systematists  
647 often discard phenotypic axes accounting for small fractions of the total variance, they may miss crucial  
648 phenotypic evidence for species limits.  
649

650

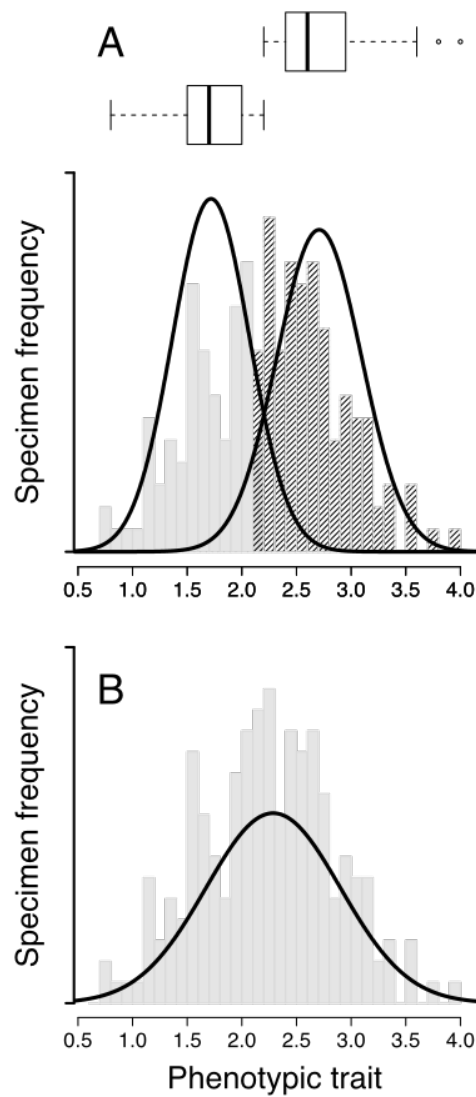

651

652

653

654

655

656

657

658

659

660

661

662

663

664

665

666

667

668

Figure 3. Differences in central tendency are not evidence of distinct phenotypic distributions. (A) Specimens from two allopatric populations (gray and striped histogram bars) differ markedly in the central tendency of a phenotypic trait (abscissa), as described by normal probability density functions (continuous black lines) and boxplots on top. The boxplots show the median (solid thick line), the interquartile range (box), whiskers extending to the most extreme values within  $1.5 \times$  interquartile ranges from the box, and outliers. The difference between means (1.717 and 2.707) is statistically significant (0.99, 95% CI: 0.89 – 1.09, t-test p-value  $< 2 \times 10^{-16}$ ). Cohen's  $d = 2.66$ , which is generally regarded as a large effect size. Note that the phenotypic ranges of the two populations do not overlap. (B) Despite the difference in central tendency and absence of phenotypic overlap, a single normal distribution (continuous black line) describes phenotypic variation across all specimens (gray bars) better than two normal distributions. In particular, empirical support for a normal mixture model assuming two distinct normal distributions (A) is substantially lower than that for a model specifying a single normal distribution (B): a difference of 10 in Bayesian Information Criterion (Schwarz 1978, Fraley and Raftery 2002). Thus, in light of the basic model for species delimitation based on quantitative phenotypic characters, there are no grounds to suggest that the specimens represent two distinct species despite marked differences in central tendency.

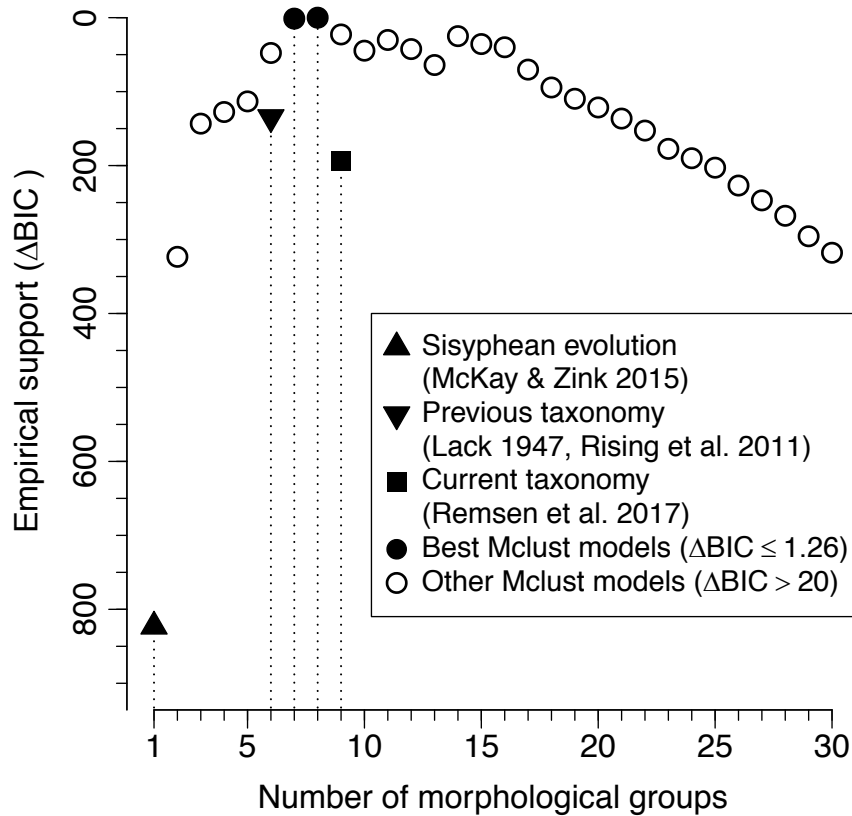

669  
670  
671 Figure 4. Analysis of morphological data strongly supported hypotheses that there are multiple distinct  
672 groups of *Geospiza* ground-finches. The plot shows the empirical support (ordinate) for normal mixture  
673 models assuming 1-30 distinct morphological groups (abscissa), and for the two models specifying  
674 groupings of specimens reflecting taxonomic treatments recognizing six species (Lack 1947, Rising et al.  
675 2011) or nine species (Remsen et al. 2017). Empirical support was measured as difference in Bayesian  
676 Information Criterion relative to the best model ( $\Delta BIC$ ). The two models with highest empirical support  
677 assumed seven and eight distinct morphological groups. Empirical support for the model corresponding to  
678 the Sisyphean evolution hypothesis positing there is a single species of ground-finch (i.e. a single  
679 morphological group; McKay and Zink 2015) was negligible ( $\Delta BIC > 820$ ).  
680  
681

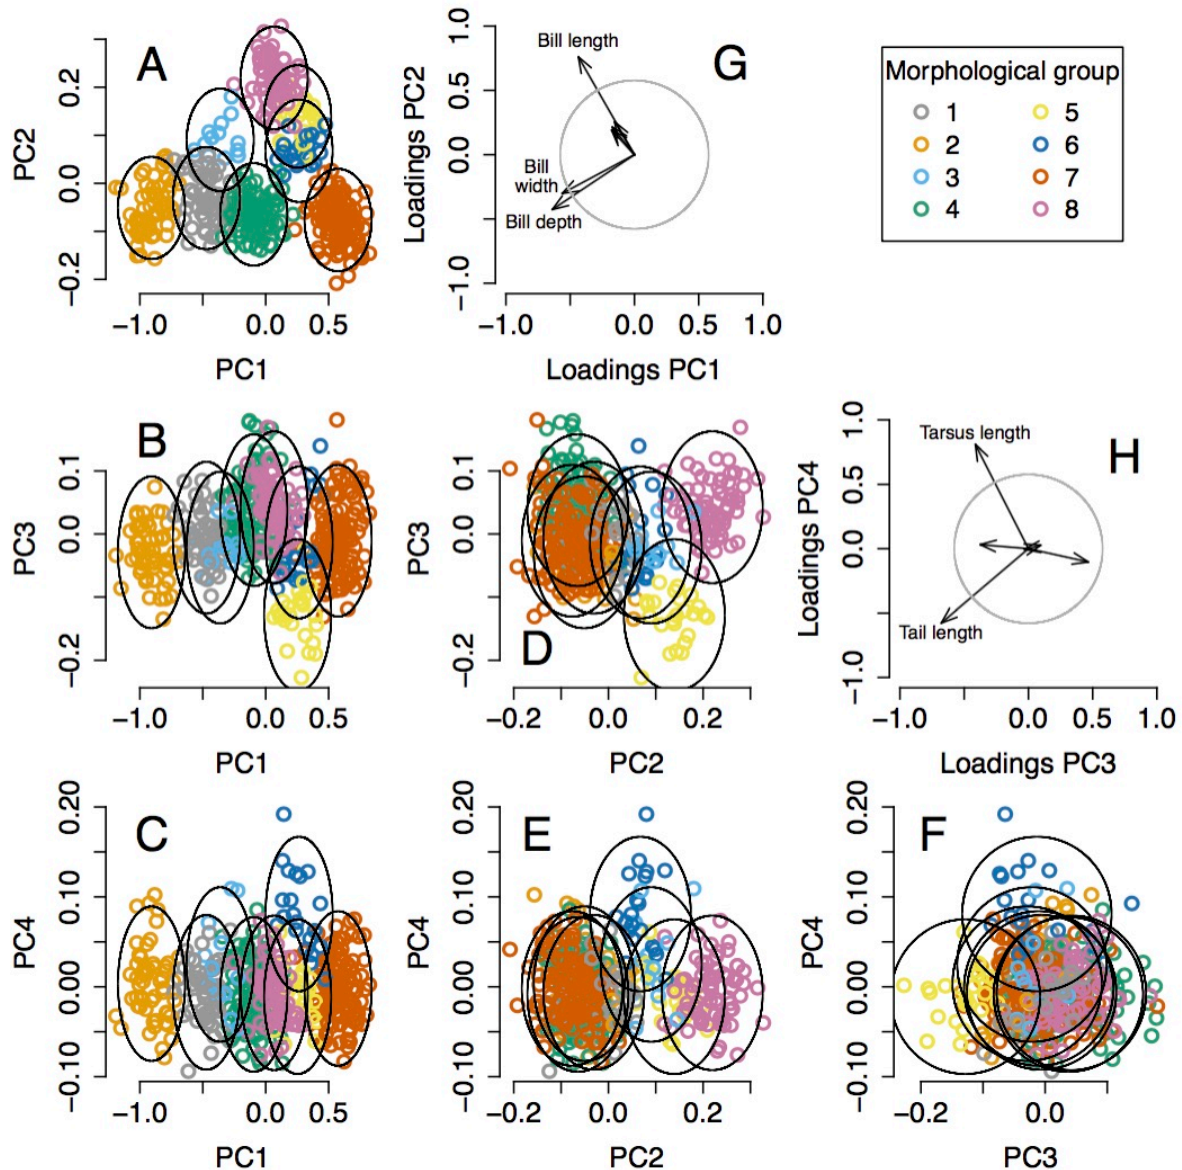

682  
 683  
 684 Figure 5. Eight morphological groups of *Geospiza* ground-finches identified by one of the best normal  
 685 mixture models. Panels A–F show the groups in the space defined by the four principal components most  
 686 useful for group discrimination (PC1–PC4). Colored symbols represent specimens assigned to different  
 687 morphological groups and ellipses show 95% high density regions for normal distributions representing  
 688 each morphological group. Arrows in G and H display the contribution of measured morphological traits  
 689 to each principal component, gauged by the loadings of each trait on each principal component (i.e.,  
 690 elements of normalized eigenvectors). Circles show the length of arrows expected if all six traits  
 691 contributed equally to bidimensional principal component spaces; arrows exceeding this expectation  
 692 contribute most significantly and are labeled. PC1 and PC2 reflect general aspects of beak size and shape  
 693 (G), with group 2 having long, deep and wide beaks, group 7 having short, shallow and narrow beaks, and  
 694 morphological group 8 having long, shallow and narrow beaks. PC3 and PC4 reflect aspects of tail and  
 695 tarsus length (H), with group 5 having a relatively long tail, and group 6 having a relatively long tarsus.  
 696 PC4 is particularly useful to distinguish group 6 despite explaining only 0.6% of the total variance. The  
 697 morphological distribution of groups in the other well supported NMM is fairly similar to the one shown  
 698 here, the main difference being that group 3 is merged into groups 1 and 8 (Supplementary Fig. 1).

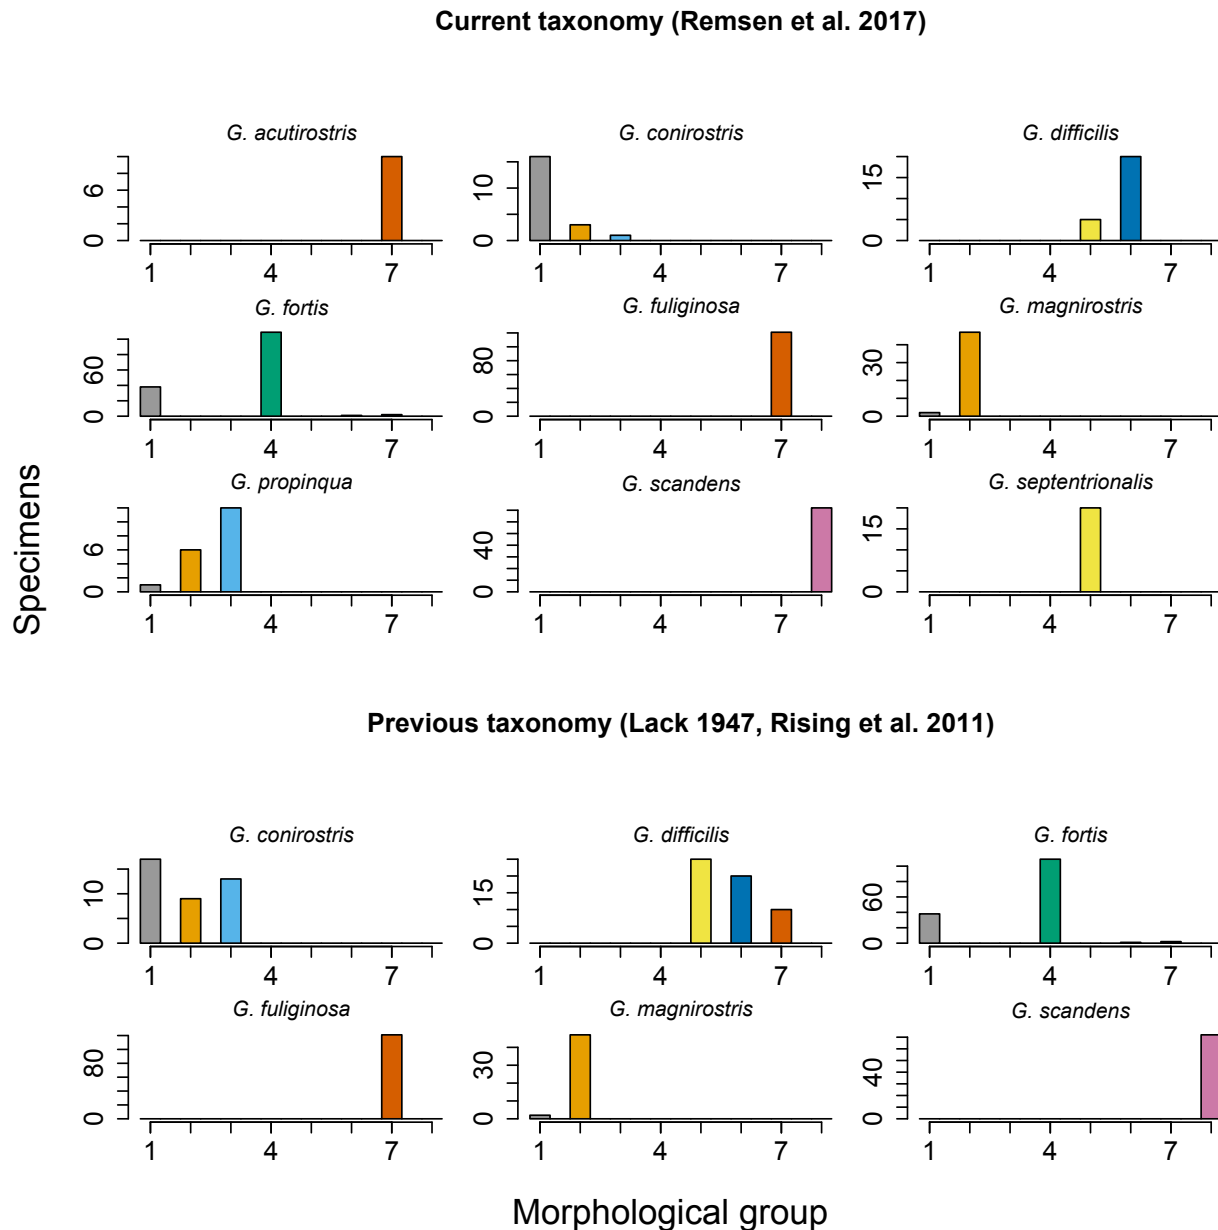

699  
 700  
 701 Figure 6. Eight morphological groups of *Geospiza* ground-finches in the Galapagos Archipelago identified  
 702 by one of the best normal mixture models partially correspond to the nine species recognized by current  
 703 taxonomy (Remsen et al. 2017) and to the six species recognized by previous taxonomy (Lack 1947,  
 704 Rising et al. 2011). Each histogram shows, for each recognized species, the number of specimens assigned  
 705 to each of the eight morphological groups. Groups are colored according to the scheme in Fig. 5.  
 706  
 707  
 708  
 709

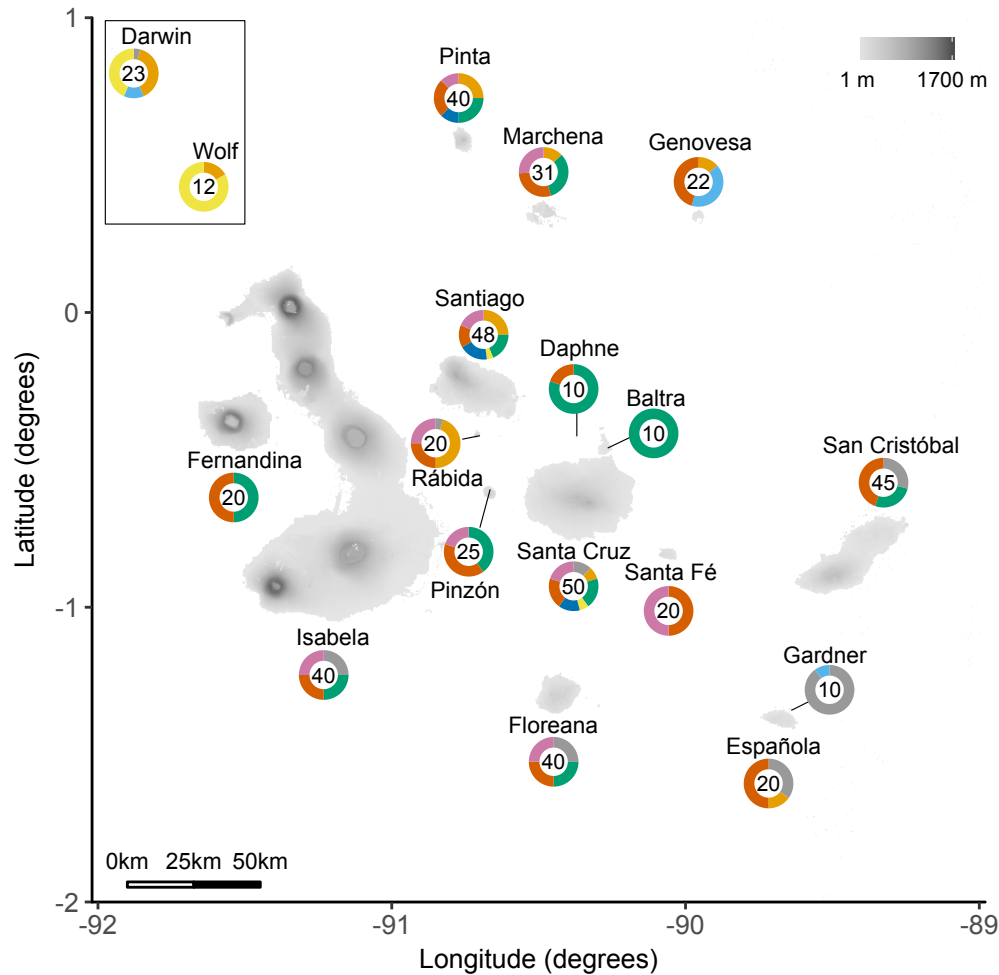

710  
711

712 Figure 7. Eight distinct morphological groups of *Geospiza* ground-finches identified by one of the best  
713 normal mixture models have broad geographic distributions across the Galapagos Archipelago. For each  
714 island, numbers indicate individuals included in the analysis and ringplots depict the fraction of such  
715 individuals assigned to each morphological group following the color scheme in Fig. 5. The existence of  
716 distinct morphological groups in potential sympatry within islands (e.g., >4 groups in Santa Cruz,  
717 Santiago, and Pinta) suggests that such groups are unlikely to reflect within-species differentiation due to  
718 geographic isolation or local adaptation.

719



720 Table 1. Number of islands in the Galapagos Archipelago where each of the eight morphological groups  
721 of *Geospiza* ground-finches identified by one of the best normal mixture models were found to occur  
722 (diagonal) and co-occur with other groups (off diagonal). All groups co-occurred with each other in at  
723 least one island, except for cases involving group 3, which did not co-occur with three other groups. Note,  
724 however, that group 3 was not recovered as distinct in the other best model, which identified only seven  
725 groups (Supplementary Table 1).

726

|         | Group 1 | Group 2 | Group 3 | Group 4 | Group 5 | Group 6 | Group 7 | Group 8 |
|---------|---------|---------|---------|---------|---------|---------|---------|---------|
| Group 1 | 8       | 4       | 2       | 4       | 2       | 1       | 6       | 4       |
| Group 2 |         | 9       | 2       | 4       | 4       | 3       | 7       | 5       |
| Group 3 |         |         | 3       | 0       | 1       | 0       | 1       | 0       |
| Group 4 |         |         |         | 11      | 2       | 3       | 10      | 7       |
| Group 5 |         |         |         |         | 4       | 2       | 2       | 2       |
| Group 6 |         |         |         |         |         | 3       | 3       | 3       |
| Group 7 |         |         |         |         |         |         | 14      | 3       |
| Group 8 |         |         |         |         |         |         |         | 9       |

727

728

729

## Supplementary Material

730  
731  
732

733 **Appendix 1.** Biological significance of differences between species in variance of phenotypic traits  
734 despite equal phenotypic means.

735

736 In analyses of phenotypic data, normal mixture models may reveal the existence of two or more normal  
737 distributions with different variances but equal means (Pearson 1894, McLachlan and Peel 2000, Hennig  
738 2010). However, the biological significance of such phenotypic patterns might not be readily evident  
739 (Hennig 2010). Traditionally, systematists examining evidence for species limits have emphasized  
740 differences between species in phenotypic means, which are a necessary condition for the occurrence of  
741 phenotypic gaps (i.e., phenotypic spaces with low frequency of individuals) between species. Therefore, it  
742 is reasonable to ask why might differences between species in the variance of phenotypic traits be  
743 meaningful despite equal phenotypic means. Here we present a simple numerical example to show that, in  
744 the context of the Fisherian model for species delimitation based on phenotypic data we described,  
745 differences between species in phenotypic variance may be biologically meaningful and thus relevant for  
746 species delimitation.

747 The example considers diploid organisms in which a polygenic trait,  $z$ , is determined by  $n$  diallelic loci  
748 lacking dominance relationships or epistasis:

749

$$750 \quad z = \sum_{i=1}^n \gamma_i (X_i + X'_i - 1) \quad (1),$$

751

752 where  $\gamma_i$  is the allelic effect at locus  $i$ , and  $X_i$  and  $X'_i$  indicate which allele is present at locus  $i$  in two  
753 homologous chromosomes, respectively. Thus,  $X_i = 1$  if the “+” allele is present in one chromosome and  
754  $X_i = 0$  otherwise. Likewise,  $X'_i = 1$  if the “+” allele is present in the other chromosome and  $X'_i = 0$   
755 otherwise. Therefore, the (genetic) mean and variance of trait  $z$  are, respectively:

756

$$757 \quad E[z] = \sum_{i=1}^n \gamma_i (2p_i - 1) \quad (2),$$

758

$$759 \quad var[z] = \sum_{i=1}^n \gamma_i^2 p_i (1 - p_i) \quad (3),$$

760

761 where  $p_i$  is the frequency of the “+” allele in locus  $i$  (de Vladar and Barton 2014). We assume eight  
762 unlinked loci ( $n = 8$ ) of equal allelic effect ( $\gamma_i = 1$  for all  $i$ ). However, many examples with varying  
763 assumptions about number of loci and allelic effects are possible.

764 Imagine two sympatric species, A and B, for which the Fisherian model for species delimitation based on  
765 phenotypic data can be reasonably applied (see main text for assumptions of this model). Further imagine  
766 that allele frequencies at the eight unlinked loci determining trait  $z$  in each species are as follows:

767

| Locus | Species A   | Species B   |
|-------|-------------|-------------|
| 1     | $p_1 = 0.5$ | $p_1 = 1$   |
| 2     | $p_2 = 0.5$ | $p_2 = 0$   |
| 3     | $p_3 = 0.5$ | $p_3 = 1$   |
| 4     | $p_4 = 0.5$ | $p_4 = 0$   |
| 5     | $p_5 = 0.9$ | $p_5 = 0.9$ |
| 6     | $p_6 = 1$   | $p_6 = 1$   |
| 7     | $p_7 = 1$   | $p_7 = 1$   |
| 8     | $p_8 = 1$   | $p_8 = 1$   |

768

769

770 It can be seen, using equations 2 and 3, that the variance of trait  $z$  is higher in species A than in species B  
771 (1.09 and 0.09, respectively), despite a common trait mean (3.8 in both species). Thus, the differences in  
772 allele frequencies between species A and B are reflected in the variance of phenotypic trait  $z$ , and not in  
773 the mean of trait  $z$ . In the context of the Fisherian model for species delimitation based on phenotypic  
774 data, these differences in allele frequencies are biologically meaningful, because they would vanish after a  
775 few generations of random mating (Templeton 2006). In other words, variation in allele frequencies  
776 resulting in equal means but different variances between populations will only persist if such populations  
777 belong to different species; hence, differences in variances that one may detect employing normal mixture  
778 models are evidence supporting the hypothesis that there is more than one species in a sample of  
779 individuals.

780

## 781 **References**

782

783 de Vladar, HP, Barton, N. 2014. Stability and response of polygenic traits to stabilizing selection and  
784 mutation. *Genetics*, 197: 749-767.

785 Hennig C. 2010. Methods for merging Gaussian mixture components. *Advances in Data Analysis and*  
786 *Classification*, 4:3-34.

787 McLachlan G, Peel DA. 2000. *Finite mixture models*. Hoboken, NJ, USA, Wiley Series in Probability and  
788 *Statistics*, John Wiley and Sons.

789 Pearson K. 1894. Contributions to the theory of mathematical evolution. *Philosophical Transactions of the*  
790 *Royal Society of London A*, 185:71-110.

791 Templeton, AR. 2006. *Population genetics and microevolutionary theory*. Hoboken, NJ, USA, John Wiley  
792 & Sons.

793

794

795 **Appendix 2.** Morphological measurements and geographic provenance of male specimens of *Geospiza*  
796 ground-finches employed in analyses are provided in a separate file **data.csv**. The data are from H. S.  
797 Swarth's archive and were employed in this study and made available thanks to permission from the  
798 California Academy of Sciences.

799

800 **Appendix 3.** R code employed to conduct analyses is provided in a separate file **Analysis\_code.R**.

801

802

803

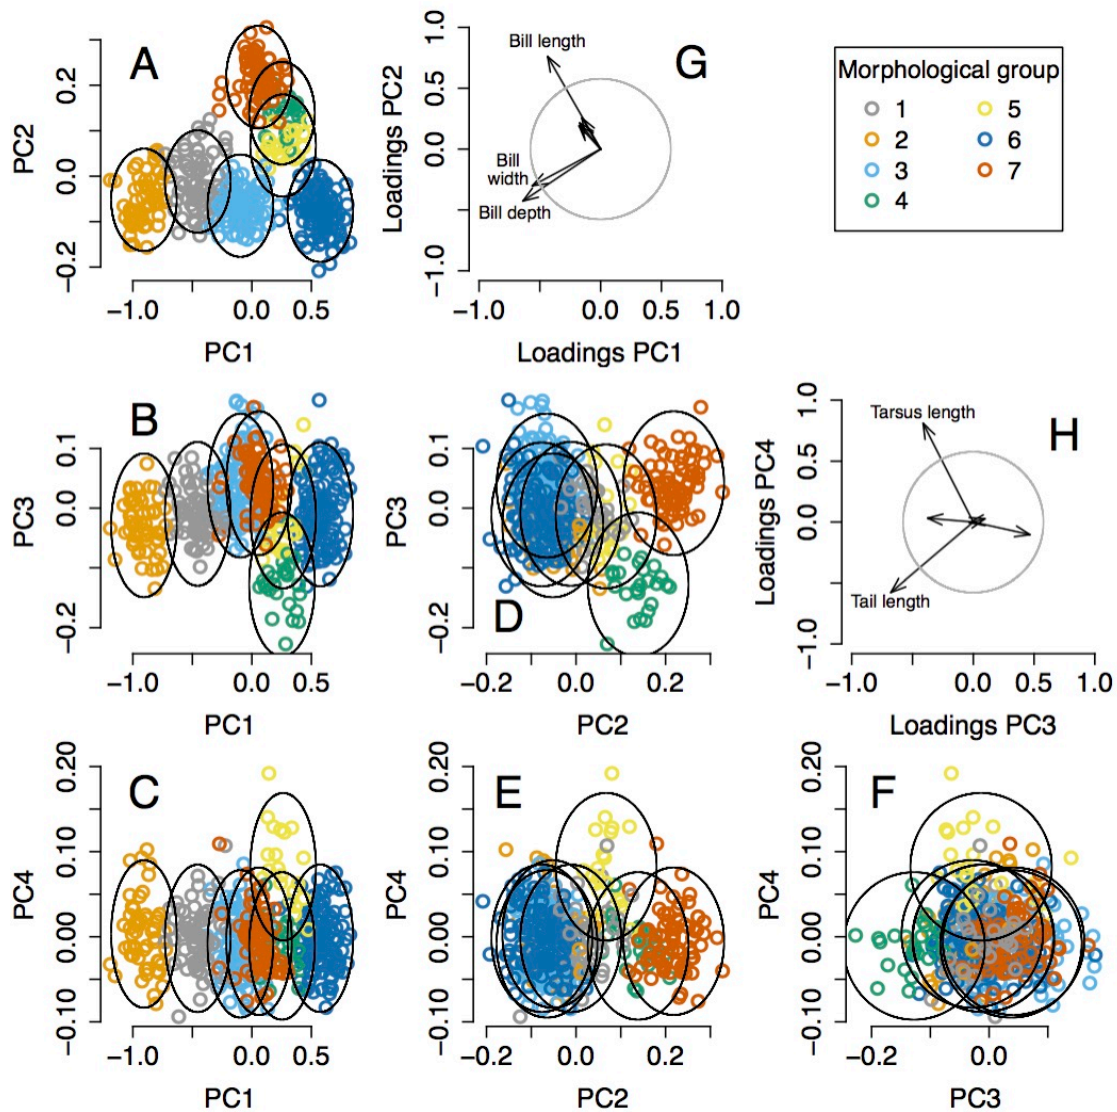

804

805

806 Supplementary Figure 1. Seven morphological groups of *Geospiza* ground-finches identified by one of the  
 807 best normal mixture models. Panels A–F show the groups in the space defined by the four principal  
 808 components most useful for group discrimination (PC1–PC4). Colored symbols represent specimens  
 809 assigned to different morphological groups and ellipses show 95% high density regions for normal  
 810 distributions representing each morphological group. Arrows in G and H display the contribution of  
 811 measured morphological traits to each principal component, gauged by the loadings of each trait on each  
 812 principal component (i.e., elements of normalized eigenvectors). Circles show the length of arrows  
 813 expected if all six traits contributed equally to bidimensional principal component spaces; arrows  
 814 exceeding this expectation contribute most significantly and are labeled. PC1 and PC2 reflect general  
 815 aspects of beak size and shape (G), with group 2 having long, deep and wide beaks, group 6 having short,  
 816 shallow and narrow beaks, and group 7 having long, shallow and narrow beaks. PC3 and PC4 reflect  
 817 aspects of tail and tarsus length (H), with group 4 having a relatively long tail, and group 5 having a  
 818 relatively long tarsus. PC4 is particularly useful to distinguish group 5 despite explaining only 0.6% of the  
 819 total variance. The morphological distribution of groups in the other well supported NMM is fairly similar  
 820 to the one shown here, the main difference being that some individuals from groups 1 and 7 are placed  
 821 together in an additional group (see Fig. 5 in main text).

822

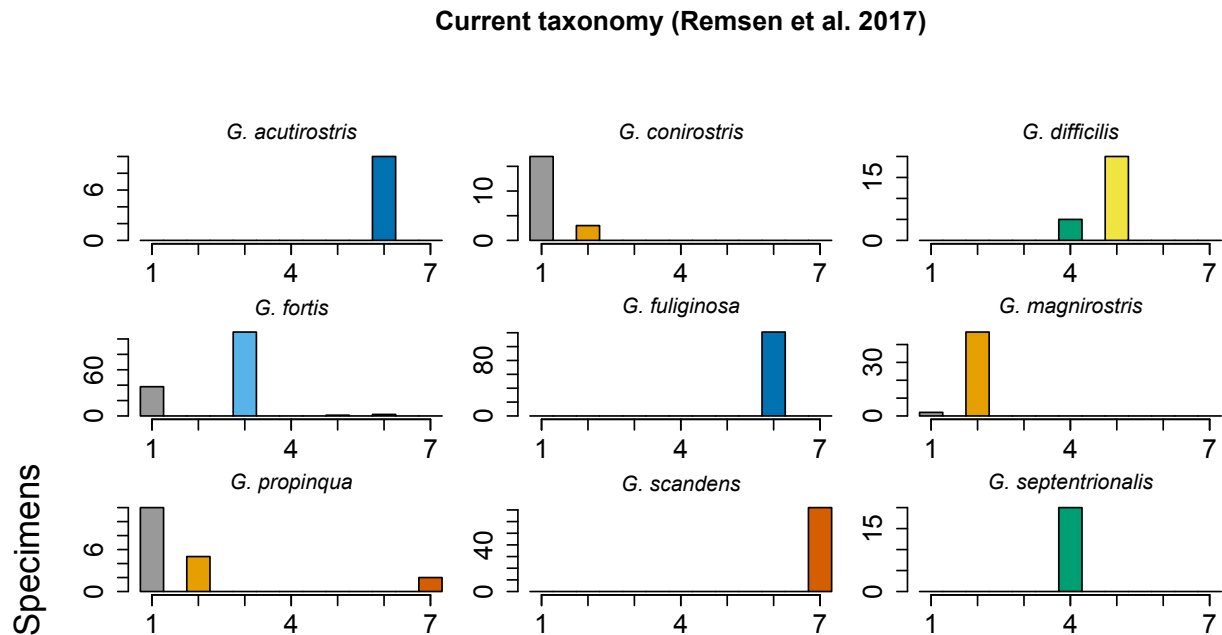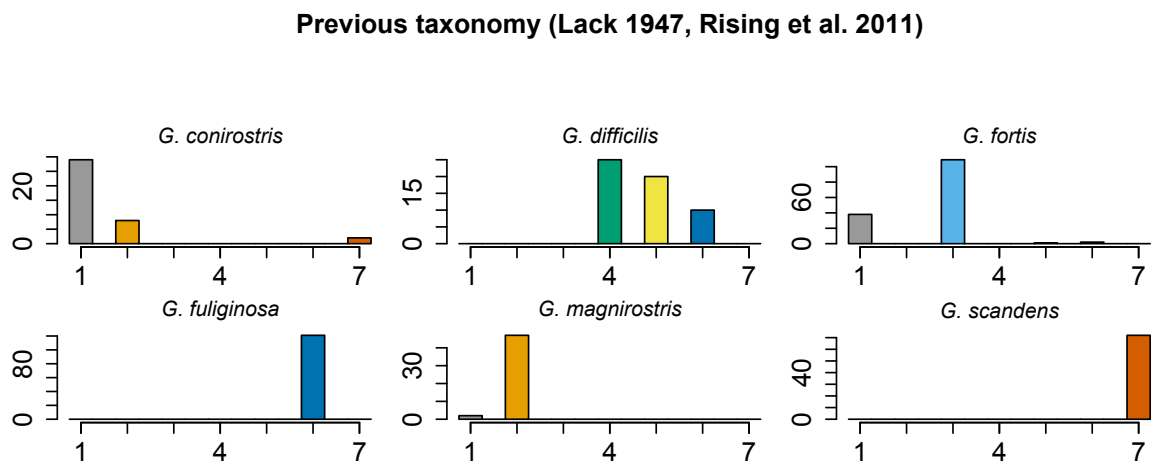

Morphological group

823  
 824  
 825 Supplementary Figure 2. Seven morphological groups of *Geospiza* ground-finches in the Galapagos  
 826 Archipelago identified by one of the best normal mixture models partially correspond to the nine species  
 827 recognized by current taxonomy (Remsen et al. 2017) and to the six species recognized by previous  
 828 taxonomy (Lack 1947, Rising et al. 2011). Each histogram shows, for each recognized species, the  
 829 number of specimens assigned to each of the eight morphological groups. Groups are colored according to  
 830 the scheme in Supplementary Fig. 1.  
 831

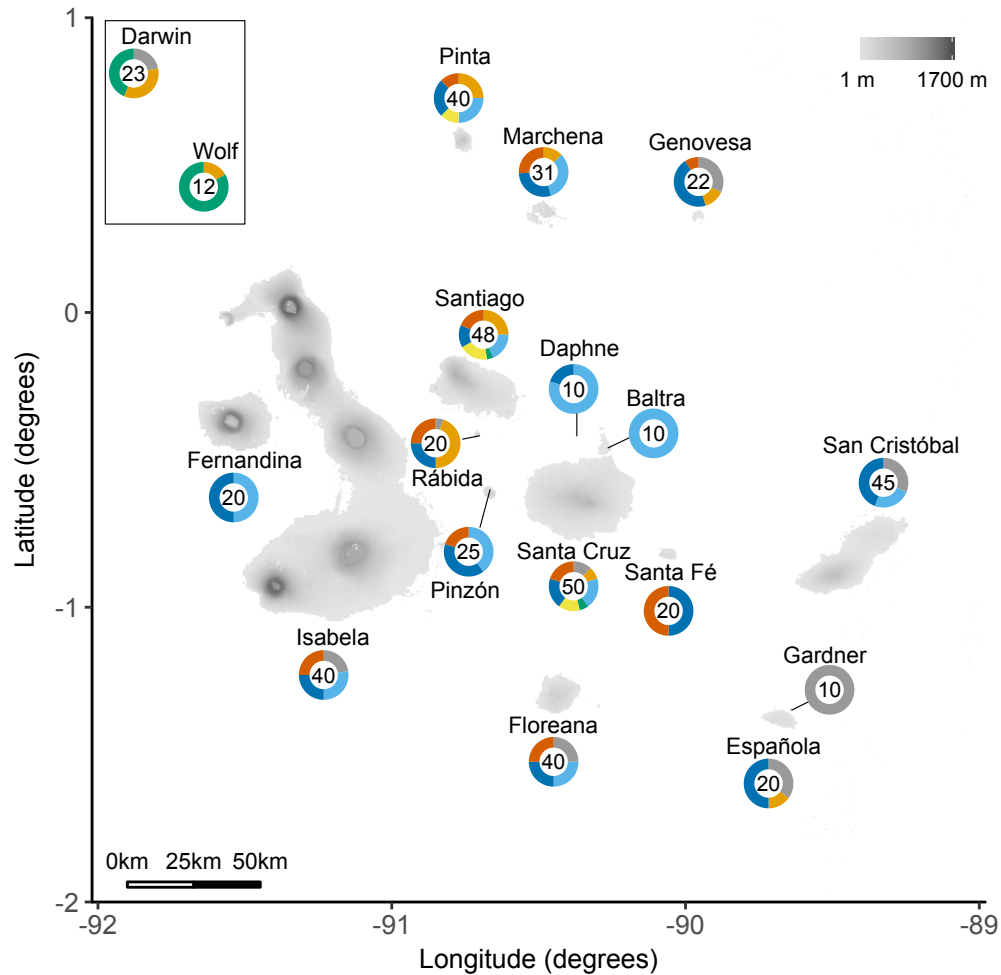

832  
833  
834 Supplementary Figure 3. Seven distinct morphological groups of *Geospiza* ground-finches identified by  
835 one of the best normal mixture models have broad geographic distributions across the Galapagos  
836 Archipelago. For each island, numbers indicate individuals included in the analysis and ringplots depict  
837 the fraction of such individuals assigned to each of the eight morphological groups following the color  
838 scheme in Supplementary Fig. 1. The existence of distinct morphological groups in potential sympatry  
839 within islands (e.g., >4 groups in Santa Cruz, Santiago, and Pinta) suggests that such groups are unlikely  
840 to reflect within-species differentiation due to geographic isolation or local adaptation.  
841

842 Supplementary Table 1. Number of islands in the Galapagos Archipelago where each of the seven  
843 morphological groups of *Geospiza* ground-finches identified by one of the best NMMs were found to  
844 occur (diagonal) and co-occur with other groups (off diagonal). All groups co-occurred with each other in  
845 at least one island.

846

|         | Group 1 | Group 2 | Group 3 | Group 4 | Group 5 | Group 6 | Group 7 |
|---------|---------|---------|---------|---------|---------|---------|---------|
| Group 1 | 9       | 5       | 4       | 2       | 1       | 7       | 5       |
| Group 2 |         | 9       | 4       | 4       | 3       | 7       | 6       |
| Group 3 |         |         | 11      | 2       | 3       | 10      | 7       |
| Group 4 |         |         |         | 4       | 2       | 2       | 2       |
| Group 5 |         |         |         |         | 3       | 3       | 3       |
| Group 6 |         |         |         |         |         | 14      | 10      |
| Group 7 |         |         |         |         |         |         | 10      |

847

848
